# Supplementary material
Source: Research Square preprint supplement (doi:10.21203/rs.3.rs-9465543/v1)
Supplement: Supplementary file 1 [file e0a8b17feb27b76acc3cf57a.docx]

**Table 1. Clinicopathologic features of oral pseudoperineurioma (n = 21)**

| **Variable** | **Findings** |
| --- | --- |
| Age (years) | Range 14–73; mean 36.1; median 31 |
| Sex | Female 11 (52%); Male 10 (48%) |
| Anatomic site | Tongue 18 (86%); Lip 3 (14%) |
| Lesion size (cm) | Range 0.3–1.5; mean 0.68 |
| Clinical impression | Fibroma / reactive / papilloma / traumatic neuroma |
| Original histologic diagnosis | | Traumatic neuroma 18 (86%); Other 3 (14%) | | --- | |

**Table 2. Histopathologic patterns of oral pseudoperineurioma**

| **A. Architectural pattern** | |
| --- | --- |
| **Pattern** | **n (%)** |
| Non-serpiginous | 13 (62%) |
| Serpiginous | 6 (29%) |
| Papillary | 2 (10%) |
| **B. Distribution modifier** | |
| **Feature** | **n (%)** |
| Extraneural perineuriomatous proliferation present | 5 (24%) |
| Intraneural only | 16 (76%) |

**Table 3. Clinicopathologic and immunohistochemical features distinguishing oral pseudoperineurioma from major histopathologic mimics**

| **Feature** | |  | | --- |  | **OPP** | | --- | | **Intraneural Perineurioma** | **TN** | |  | | --- |  | **Plexiform Neurofibroma** | | --- | |
| --- | --- | --- | --- | --- | --- | --- | --- | --- |
| Nature of lesion | Reactive perineurial proliferative lesion | True perineurial neoplasm | Reactive regenerative lesion | Benign peripheral nerve sheath tumor associated with NF1 |
| Typical nerve involved | Small, unnamed peripheral nerves | Major peripheral nerve trunk | Injured peripheral nerve | Major or minor peripheral nerves |
| Common oral sites | Tongue (predominant), lip | Rare in oral cavity | Lip, mental foramen, alveolar ridge | Rare in oral cavity |
| Clinical presentation | Small, asymptomatic, nonspecific mucosal nodule | Slowly progressive mass, may have neurologic deficits | Often painful; history of trauma may be present | irregular mass often described as bag of warms |
| Architectural pattern | Pseudo–onion bulb–like perineurial collars; serpiginous, non-serpiginous, papillary patterns | Concentric multilayered perineurial proliferation | Disorganized nerve fascicles with axonal sprouting | Plexiform proliferation of nerve fascicles |
| Perineurial integrity | Discontinuous or absent native perineurium | Typically preserved | Variable; often disrupted by injury | Preserved |
| Dominant cellular component | Perineurial cells | Perineurial cells | Schwann cells and axons | Schwann cells |
| Stromal component | Prominent fibrous/collagenous stroma | Minimal | Variable fibrosis | Myxoid to collagenous |
| Pseudo–onion bulbs | Present (single or double layers) | Present (multilayered) | Absent | Absent |
| IHC | (+) for perineurial markers (EMA, Claudin, GLUT1 and CD56) | (+) for perineurial markers (EMA, Claudin, GLUT1 and CD56) | Diffusely (+) for S100, (-) for perineural markers | Diffusely (+) for S100, (-) for perineural markers |
| Molecular findings | No recurrent alterations identified to date | TRAF7 alterations | None | NF1-associated in syndromic cases |

**OPP: Oral pseudoperineurioma, TN: Traumatic neuroma, IHC: Immunohistochemistry**
